# Supplementary material for: Claisened Hexafluoro Inhibits Metastatic Spreading of Amoeboid Melanoma Cells
Source: Cancers (Basel). 2021 Jul 15;13(14):3551. doi: 10.3390/cancers13143551 (PMC8305480; doi:10.3390/cancers13143551)
Supplement: Supplementary file 1 [file cancers-13-03551-s001.zip]

Archive with 10 entries (10 files):
- Cancers-1096282-supplementary/cancers-1096282-supplementary-proof.docx
- Cancers-1096282-supplementary/Supplementary_Figures/SuppFig.1.pdf
- Cancers-1096282-supplementary/Supplementary_Figures/SuppFig.2.pdf
- Cancers-1096282-supplementary/Supplementary_Figures/SuppFig.3.pdf
- Cancers-1096282-supplementary/Supplementary_Materials/Original_WB.pdf
- Cancers-1096282-supplementary/VideoDef/Video1_A375M6_CH.avi
- Cancers-1096282-supplementary/VideoDef/Video1_A375M6_CTRL.avi
- Cancers-1096282-supplementary/VideoDef/Video2_HS294T_CH.avi
- Cancers-1096282-supplementary/VideoDef/Video2_HS294T_CTRL.avi
- cancers-1096282-supplementary-proof.pdf
