# Supplementary figures and images for: Claisened Hexafluoro Inhibits Metastatic Spreading of Amoeboid Melanoma Cells
Source: MDPI journal article supplement (doi:10.3390/cancers13143551), 2021-07-15

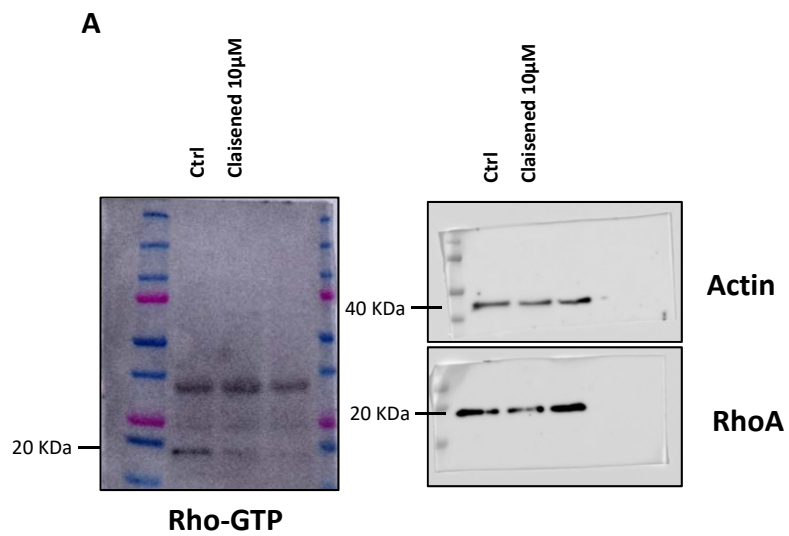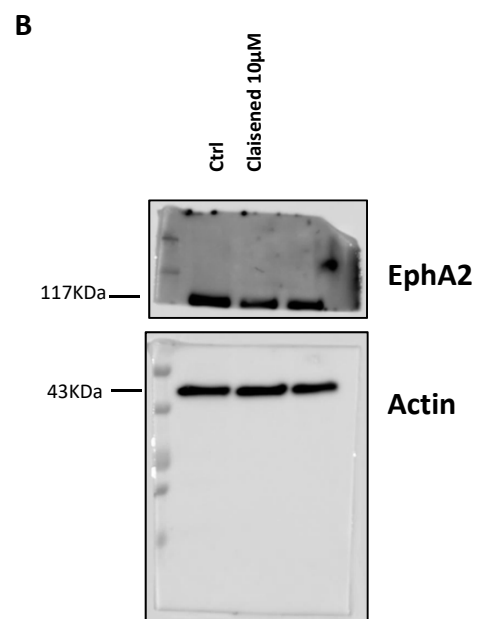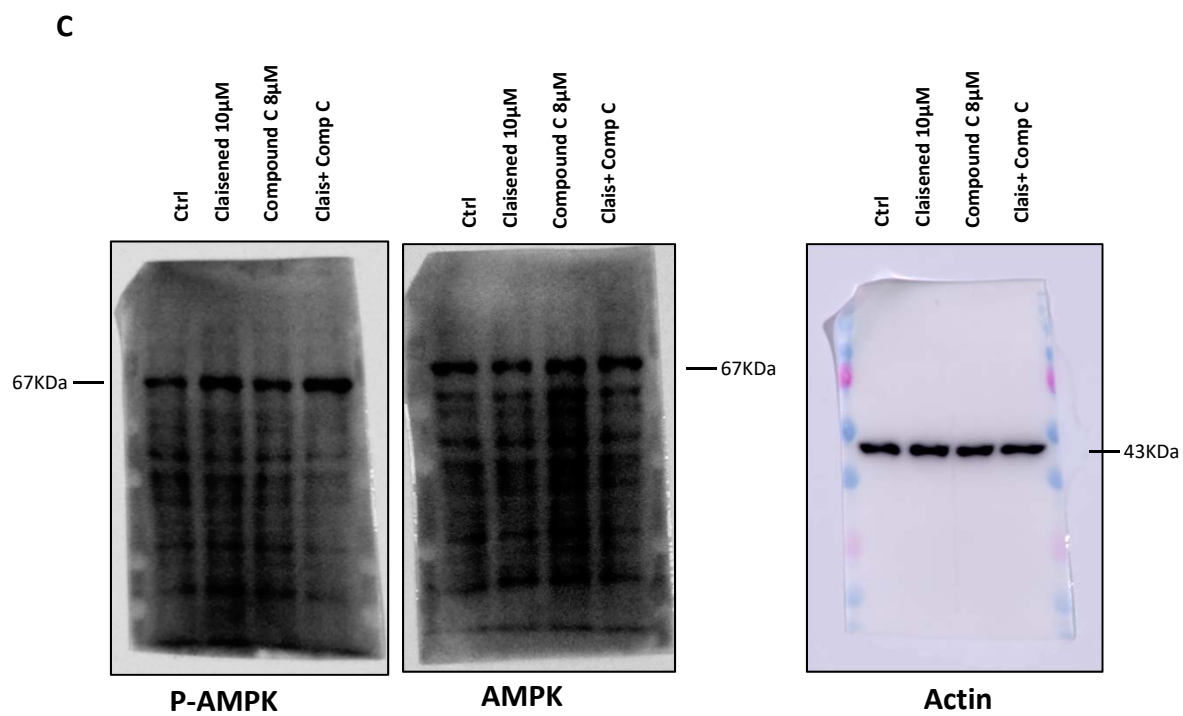

WM1361

Rho-GTP

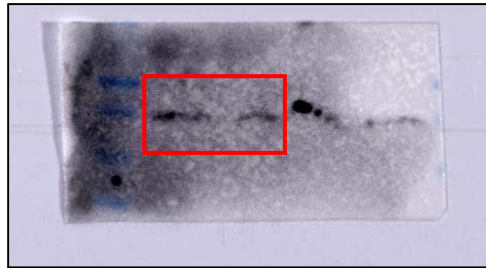

RhoA

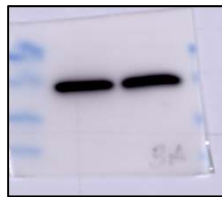

Actin for Rho

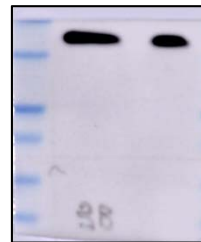

EphA

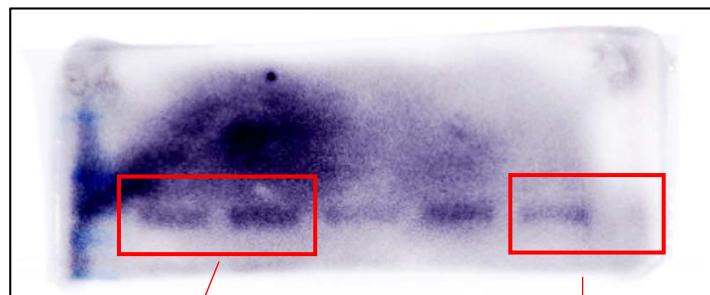

HS294T

WM1361

Actin for EphA in HS294T

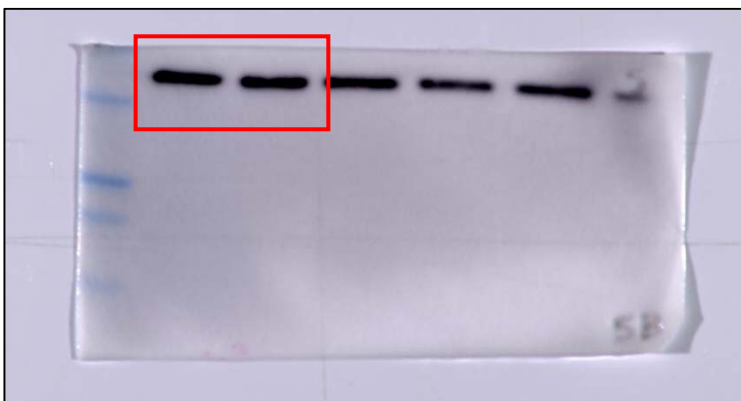

Actin for EphA in WM1361

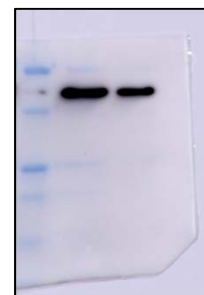

Supplement: s1 [file Original_WB.pdf › Cancers-1096282-supplementary/Supplementary_Materials/Original_WB.pdf]
